# Supplementary material
Source: PubMed Central journal article supplement (PMC3036546)
Supplement: supp_214_5_717__1.pdf [file supp_214_5_717__1.pdf]

Table S1. Experimental conditions used to examine wings across a range of flow conditions [Reynolds numbers ( $Re$ ) and tip velocities

| $Re$                          | Age (d.p.h.)                               |                                            |                                          |                                          |                                          |
|-------------------------------|--------------------------------------------|--------------------------------------------|------------------------------------------|------------------------------------------|------------------------------------------|
|                               | 8                                          | 10                                         | 20                                       | 49                                       | 100                                      |
| 6300–8990                     | 578 RPM,<br>4.7 m s <sup>-1</sup> at tip   | 387 RPM,<br>3.8 m s <sup>-1</sup> at tip   | 184 RPM,<br>2.8 m s <sup>-1</sup> at tip | x                                        | x                                        |
| 10,090–14,400                 | 925 RPM,<br>7.6 m s <sup>-1</sup> at tip   | 619 RPM,<br>6.0 m s <sup>-1</sup> at tip   | 295 RPM,<br>4.4 m s <sup>-1</sup> at tip | 125 RPM,<br>3.0 m s <sup>-1</sup> at tip | x                                        |
| 12,893 (10 d.p.h. equivalent) | 1181 RPM,<br>9.6 m s <sup>-1</sup> at tip  | 657 RPM,<br>6.4 m s <sup>-1</sup> at tip   | 264 RPM,<br>3.9 m s <sup>-1</sup> at tip | 125 RPM,<br>3.0 m s <sup>-1</sup> at tip | 101 RPM,<br>2.6 m s <sup>-1</sup> at tip |
| 19,000–27,100                 | 1741 RPM,<br>14.2 m s <sup>-1</sup> at tip | 1165 RPM,<br>11.4 m s <sup>-1</sup> at tip | 556 RPM,<br>8.3 m s <sup>-1</sup> at tip | 235 RPM,<br>5.6 m s <sup>-1</sup> at tip | x                                        |
